# Supplementary material for: Unique dendritic Bi2S3 with ultrathin nanosheets rich in S vacancy-defects toward promoting highly efficient photothermal CO2 reduction into CO
Source: Royal Society of Chemistry journal article supplement (doi:10.1039/d4cy00152d), 2024-01-01
Supplement: d4cy00152d1.pdf [file d4cy00152d1.pdf]

## Supporting Information

### **Unique dendritic Bi<sub>2</sub>S<sub>3</sub> with ultrathin nanosheets rich in S vacancy-defect toward promoting highly efficient photothermal CO<sub>2</sub> reduction into CO**

YanJun Zhu,<sup>a,b</sup> Qiutong Han,<sup>c,\*</sup> He Qu,<sup>e</sup> Yan Shen,<sup>d</sup> Xin Zhou,<sup>e,\*</sup> Zhigang Zou,<sup>a,b,f</sup> and Yong Zhou<sup>a,b,f,g,\*</sup>

<sup>a</sup> National Laboratory of Solid State Microstructures, Collaborative Innovation Center of Advanced Microstructures, School of Physics, Nanjing University, Nanjing 210093, P. R. China. E-mail: zhouyong1999@nju.edu.cn

<sup>b</sup> Eco-Materials and Renewable Energy Research Center (ERERC), Jiangsu Key Laboratory for Nano Technology, Nanjing University, Nanjing 210093, P. R. China.

<sup>c</sup> State Key Laboratory of Materials-Oriented Chemical Engineering, School of Physical and Mathematical Sciences, Nanjing Tech University, Nanjing 211816, P. R. China. E-mail: hanqt@njtech.edu.cn

<sup>d</sup> College of Materials Science and Engineering, Nanjing Tech University, Nanjing 211816, P.R. China.

<sup>e</sup> College of Environment and Chemical Engineering, Dalian University, Dalian 116622, P. R. China. E-mail : zhouxin@dlu.edu.cn

<sup>f</sup> School of Science and Engineering, The Chinese University of Hongkong (Shenzhen) Shenzhen 518172, P. R. China.

<sup>g</sup> School of Chemical and Environmental Engineering, Anhui Polytechnic University Wuhu 241000, P. R. China

**Table S1** Fitting result of XPS for Bi and S

| Samples | Elements | Fitted area | Ratio of S/Bi |
|---------|----------|-------------|---------------|
| BS      | Bi       | 1945.26     | 0.714         |
|         | S        | 1391.66     |               |
| Vs-BS1  | Bi       | 4236.63     | 0.446         |
|         | S        | 1887.67     |               |

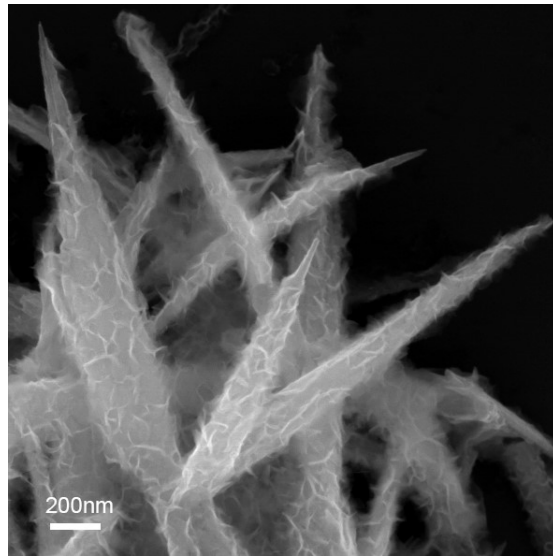

**Fig. S1** SEM images of BS.

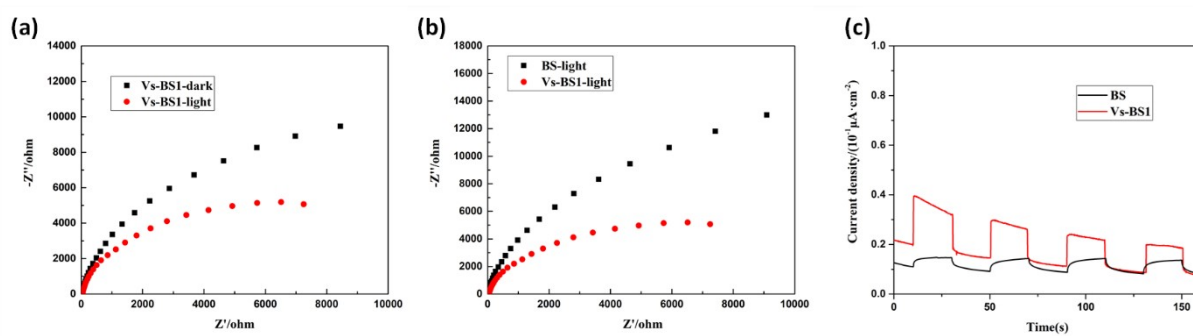

**Fig. S2** (a) EIS Nyquist plots of the Vs-BS1 in the light and in the dark (b) EIS Nyquist plots of the BS and Vs-BS1 in the light (c) Transient photocurrent responses of BS and Vs-BS1.

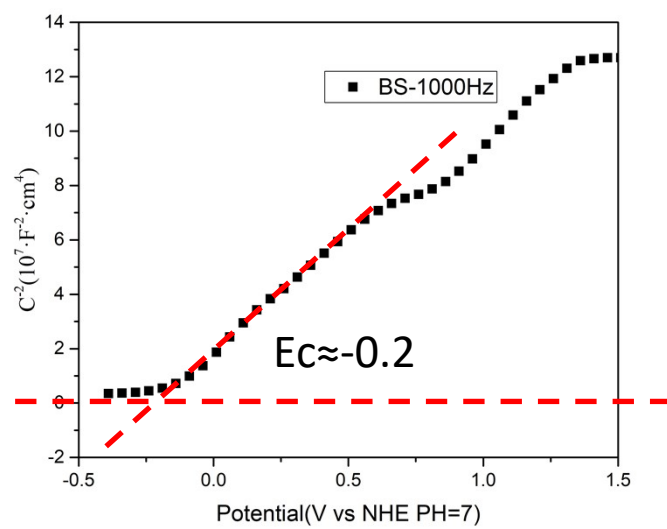

**Fig. S3** Mott Schottky Curve of BS.

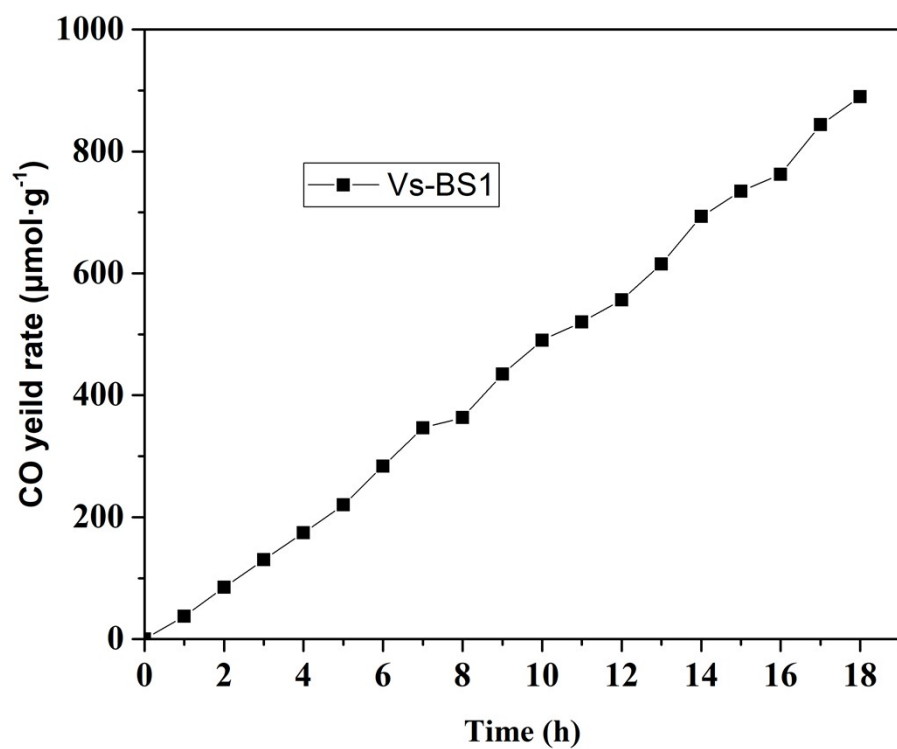

**Fig. S4** The stability of photocatalytic performance of Vs-BS1 under the irradiation of a 300 W xenon lamp after 18 hours.

**Computational details:** Density functional calculations were performed by using the Vienna ab initio simulation package (VASP).<sup>1, 2</sup> The projector-augmented wave method was applied to consider electron-ion interactions.<sup>3</sup> The Perdew-Burke-Ernzerhof (PBE) functional within the generalized gradient approximation (GGA) was adopted for describing the exchange correlation.<sup>4</sup> The studied structures were relaxed by utilizing 450 eV as the cutoff energy for basis function. A  $9 \times 3 \times 3$  Monkhorst-Pack type of  $k$ -point sampling was used for bulk  $\text{Bi}_2\text{S}_3$ . The calculated lattice parameters are  $a=4.017$  Å,  $b=11.170$  Å,  $c=11.778$  Å, which are in good agreement with experimental data. Three low-indexed surfaces are created by cleaving the relaxed bulk structure through the corresponding planes and the resultant structures are depicted in Figure S5. The lateral dimensions of slab models are  $11.170$  Å  $\times$   $11.778$  Å for (100) surface,  $11.778$  Å  $\times$   $4.017$  Å for (010) surface, and  $4.017$  Å  $\times$   $11.170$  Å for (001) surface. Monkhorst-Pack  $k$ -point meshes of  $3 \times 3 \times 1$ ,  $3 \times 9 \times 1$ , and  $9 \times 3 \times 1$  are applied on structural and energetic calculations of (100), (010) and (001) surfaces, respectively. A vacuum region of 15 Å was added along the  $z$ -direction to avoid mirror interaction between adjacent supercells. Convergence thresholds of  $10^{-5}$  eV for the energy and  $0.01$  eV Å<sup>-1</sup> for the forces were used for all optimizations.

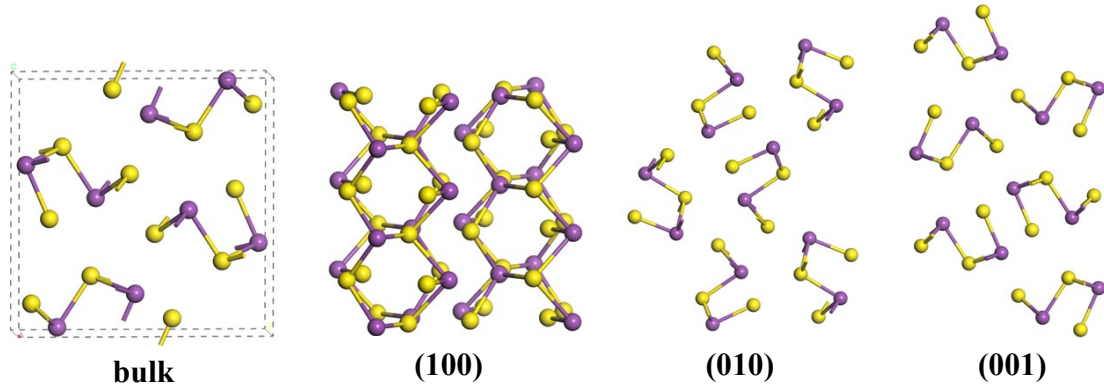

**Fig. S5** Illustration of bulk and low-indexed surfaces of  $\text{Bi}_2\text{S}_3$ . The purple and yellow balls represent Bi and S atoms, respectively.

To estimate the relative stability of surfaces, the surface energy is calculated according to the following equation:

$$\gamma = (E_{\text{slab}} - n E_{\text{Bi}_2\text{S}_3}) / 2A \quad (1)$$

where  $E_{\text{slab}}$  is the energy of a slab model,  $n$  is the number of  $\text{Bi}_2\text{S}_3$  bulk units in the slab, and  $2A$  is the total exposed area of the two identical sides of the slab. The computed surface energies are  $0.29 \text{ J/m}^2$  for (100) surface,  $0.34 \text{ J/m}^2$  for (010) surface,  $0.36 \text{ J/m}^2$  for (001) surface. The smaller the surface energy, the more stable the surface. The results suggest that (100) surface is more stable than (010) and (001), which is also consistent with the experimental observations. Therefore, we will only do further investigations on (100) surface.

Initially, we considered all possible active sites for  $\text{CO}_2$  adsorption on the clean surface and the surface with a S vacancy in the top layer ( $\text{V}_\text{s}\text{-Bi}_2\text{S}_3$ ). The adsorption energy ( $E_{\text{ads}}$ ) of a  $\text{CO}_2$  molecule on a surface is defined according to the following equation:

$$E_{\text{ads}} = E_{\text{total}} - E_{\text{surface}} - E_{\text{CO}_2} \quad (2)$$

where  $E_{\text{total}}$  is the total energy of a  $\text{CO}_2$  molecule supported on a surface,  $E_{\text{surface}}$  is the energy of a clean surface, and  $E_{\text{CO}_2}$  is the energy of a  $\text{CO}_2$  molecule in a supercell with the same size as the clean surface. According to the definition, a negative value of  $E_{\text{ads}}$  means a thermodynamically favorable adsorption process. The most stable structures are shown in Fig. S6. As shown in Fig. S6, the adsorption energies of a  $\text{CO}_2$  molecule are  $-0.21 \text{ eV}$  on the  $\text{Bi}_2\text{S}_3$  surface and  $-0.33 \text{ eV}$  on  $\text{V}_\text{s}\text{-Bi}_2\text{S}_3$ , which indicates that the  $\text{CO}_2$  adsorption on the latter is more stable.

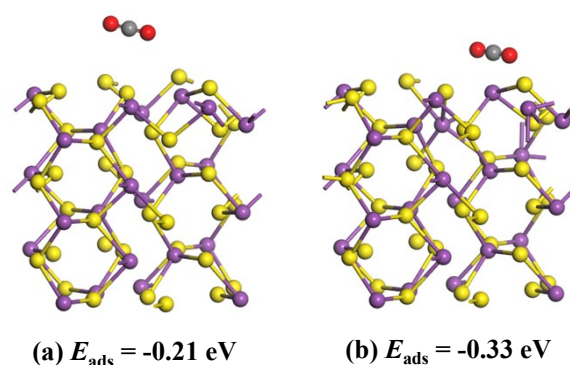

**Fig. S6** The optimized structures and the calculated adsorption energies of a  $\text{CO}_2$  molecule supported on (a) the clean surface and (b) the surface with a S vacancy in the top layer.

To calculate the reaction free energy for each of the reaction steps, we follow Norskov's Computational Hydrogen Electrode (CHE) approach,<sup>5</sup>

$$\Delta G = \Delta E_{\text{ads}} + \Delta ZPE - T\Delta S \quad (3)$$

where  $\Delta E_{\text{ads}}$  refers to the density functional theory reaction energy,  $\Delta ZPE$  and  $\Delta S$  are changes in zero-point energy and entropy, respectively. The values of ZPE are computed by vibration frequencies and  $\Delta S$  are obtained from standard tables for gas-phase molecules.<sup>6</sup> We assume that  $S$  equals zero for the species adsorbed to the surface.

## Reference

- 1 G. Kresse and J. Furthmüller, Efficiency of ab-initio total energy calculations for metals and semiconductors using a plane-wave basis set, *Comput. Mater. Sci.*, 1996, **6**, 15-50.
- 2 G. Kresse and J. Furthmüller, Efficient iterative schemes for ab initio total-energy calculations using a plane-wave basis set, *Phys. Rev. B*, 1996, **54**, 11169-11186.
- 3 P. E. Blöchl, Projector augmented-wave method, *Phys. Rev. B*, 1994, **50**, 17953-17979.
- 4 J. P. Perdew, K. Burke and M. Ernzerhof, Generalized Gradient Approximation Made Simple, *Phys. Rev. Lett.*, 1996, **77**, 3865-3868.
- 5 J. K. Nørskov, T. Bligaard, A. Logadottir, J. R. Kitchin, J. G. Chen, S. Pandalov and U. Stimming, Trends in the Exchange Current for Hydrogen Evolution, *J. Electrochem. Soc.*, 2005, **152**, J23.
- 6 D. R. Lide, *CRC Handbook of Chemistry and Physics*, CRC, Press, Boca Raton, FL, 84th Edn, 2003-2004.
